1 Three-dimensional printing of patient-specific lung phantoms for  
2 CT imaging: emulating lung tissue with accurate attenuation  
3 profiles and textures

4  
5 **Kai Mei<sup>1</sup>, Michael Geagan<sup>1</sup>, Leonid Roshkovan<sup>1</sup>, Harold I. Litt<sup>1</sup>, Grace J. Gang<sup>2</sup>, Nadav  
6 Shapira<sup>1</sup>, J. Webster Stayman<sup>2</sup>, and Peter B. Noël<sup>1,3</sup>**

7  
8  
9 <sup>1</sup>Department of Radiology, Perelman School of Medicine, University of Pennsylvania,  
10 Philadelphia, PA, USA.

11 <sup>2</sup>Department of Biomedical Engineering, Johns Hopkins University, Baltimore, MD, USA.

12 <sup>3</sup>Department of Diagnostic and Interventional Radiology, School of Medicine & Klinikum rechts  
13 der Isar, Technical University of Munich, 81675 München, Germany.

14  
15  
16  
17  
18  
19  
20  
21  
22  
23  
24  
25  
26  
27

Corresponding Authors: Kai Mei, Email: [kai.mei@pennmedicine.upenn.edu](mailto:kai.mei@pennmedicine.upenn.edu)  
Peter B. Noël, Email: [pbnoel@upenn.edu](mailto:pbnoel@upenn.edu)

28 **Abstract**

29 **Purpose:** Phantoms are a basic tool for assessing and verifying performance in CT research and  
30 clinical practice. Patient-based realistic lung phantoms accurately representing textures and  
31 densities are essential in developing and evaluating novel CT hardware and software. This study  
32 introduces PixelPrint, a 3D printing solution to create patient-based lung phantoms with accurate  
33 attenuation profiles and textures.

34 **Methods:** PixelPrint, a software tool, was developed to convert Patient DICOM images directly  
35 into printer instructions (G-code). The density was modeled as the ratio of filament to voxel volume  
36 to emulate attenuation profiles for each voxel. A calibration phantom was designed to determine  
37 the mapping between filament line width and Hounsfield Units (HU) within the range of human  
38 lungs. For evaluation of PixelPrint, a phantom based on a human lung slice was manufactured  
39 and scanned with the same CT scanner and protocol used for the patient scan. Density and  
40 geometrical accuracy between phantom and patient CT data was evaluated for various  
41 anatomical features in the lung.

42 **Results:** For the calibration phantom, measured mean Hounsfield units show a very high level of  
43 linear correlation with respect to the utilized filament line widths, ( $r > 0.999$ ). Qualitatively, the CT  
44 image of the patient-based phantom closely resembles the original CT image both in texture and  
45 contrast levels, with clearly visible vascular and parenchymal structures. Regions-of-interest  
46 (ROIs) comparing attenuation illustrated differences below 15 HU. Manual size measurements  
47 performed by an experienced thoracic radiologist reveal a high degree of geometrical correlation  
48 of details between identical patient and phantom features, with differences smaller than the  
49 intrinsic spatial resolution of the scans.

50 **Conclusion:** The present study demonstrates the feasibility of 3D printed patient-based lung  
51 phantoms with accurate organ geometry, image texture, and attenuation profiles. PixelPrint will  
52 enable applications in the research and development of CT technology, including further  
53 development in radiomics.

## 54 **Introduction**

55 Anthropomorphic phantoms, geometric image quality phantoms, and mathematical phantoms are  
56 fundamental tools for developing, optimizing, and evaluating novel methods in computed  
57 tomography (CT) research and clinical practice. Common CT phantoms are typically  
58 manufactured by casting, forming, and molding homogenous materials such as resin or plastic.  
59 While many different phantoms are available commercially and in research laboratories, there is  
60 a lack of patient-based phantoms that fully represent attenuation profiles and textures seen in  
61 clinical CT acquisitions, for example, for healthy and diseased lungs. Additionally, the academic  
62 and clinical CT community would benefit from a rapid and inexpensive manufacturing process  
63 compared to current commercial solutions.

64 Over the last decade, fused deposition modeling (FDM)-based 3-dimensional (3D) printing of  
65 various tissue-mimicking phantoms has been widely explored for validation and evaluation of CT  
66 imaging technology<sup>1-6</sup>. Studies have focused on several areas, including manufacturing  
67 geometrically correct models of organs<sup>7-11</sup>, generating realistic texture samples<sup>12-14</sup>, and creating  
68 accurate attenuation profiles<sup>15-18</sup>. The general procedure to 3D print an anthropomorphic phantom  
69 from CT image data includes: (i) segmentation of regions/organs of interest in CT images, (ii)  
70 conversion of selected regions from volumetric data to triangulated surface geometry models (e.g.,  
71 STL or SLA files), and (iii) use of printer-specific slicing software to apply proper parameters (e.g.,  
72 extrusion rate, print speed, infill ratios, etc.) and generate instructions (G-code) for printers to  
73 create 3D products. While this approach produces phantoms that better resemble true anatomical  
74 structures, it still has shortcomings. First, spatial resolution is largely lost due to segmentation of  
75 regions and conversion to surface models. Second, for each region/surface model, the slicer  
76 software assigns unique infill and exterior walls (or perimeter), creating abrupt, unrealistic  
77 transitions between regions of different densities in the final product. Third, due to its reliance on  
78 segmentation, this method is susceptible to boundary placement errors.

79 A promising alternative is to directly translate DICOM image data into G-code<sup>17,18</sup>. To generate  
80 different densities in 3D printed CT phantoms, these methods utilize a pixel-by-pixel change in  
81 the filament extrusion rate, while maintaining a constant printing speed. Although this approach  
82 enables generation of sophisticated phantoms with realistic attenuation profiles, it falls short when  
83 printing high-resolution features. This reduction in spatial resolution is an important concern when  
84 generating natural image textures. Therefore, there is an unmet need for a quick and cost-efficient  
85 process for generating patient-based phantoms with accurate organ geometry, image texture,  
86 and attenuation profiles.

87 We propose a 3D printing solution that is capable of achieving accurate organ geometry, image  
88 texture, and attenuation profiles while eliminating the complexities and limitations of previous  
89 methods. Our solution is a one-step method for translating CT images into printer instructions (G-  
90 code) that can be used by any FDM 3D printer. It combines varying printer speeds with a constant  
91 filament extrusion rate to control the density of each printed voxel. In the following sections we  
92 present a complete description of the proposed method, as well as results from successful proof-  
93 of-principle experiments with geometrical and patient-based lung phantoms.

## 94 **Materials and Methods**

### 95 **PixelPrint**

96 Conventional 3D printing utilizes slicing software to convert 3D models (e.g., STL files) to printer  
97 instructions written in G-code, a widely used machine language defining 3D printing parameters  
98 (e.g., layer height, retraction, print speed, etc.). We present a solution that accepts volumetric CT  
99 DICOM data as input and converts these data directly into G-code without segmentation or  
100 intermediate 3D models.

101 Applied to common FDM 3D printers, PixelPrint produces multiple 2D layers, one layer at a time,  
102 to create 3D objects or phantoms. Each printed layer is mapped from the corresponding DICOM  
103 slice, with the physical scale controlled to ensure that the resulting phantom has the same

104 dimensions as the scanned patient. For each layer in the 3D printed phantom, PixelPrint  
105 generates an array of spaced, parallel filament lines. The lines are at fixed spacing but are of  
106 varying widths, creating a partial volume effect to form varying densities in the CT scan, i.e., wider  
107 line widths for high-density areas and narrower line widths for low-density areas. PixelPrint  
108 computes the density of the input image at closely spaced intervals along each line and maps it  
109 into appropriate extrusion and printhead speeds over each interval. It then records one G-code  
110 command that defines a starting point, an end point, the filament extrusion, and speed for that  
111 interval. This process is repeated for every interval over every line, in every layer, until the whole  
112 phantom is fully encoded in a G-code file. Since layers are deposited in alternating directions, the  
113 varying line widths create a matrix of high- and low-density regions that correlate with the original  
114 3D input image volume. The matrices are shifted in angle and location at each layer, and the  
115 printed layer height is much smaller than the typical CT slice thickness. Each CT slice of the  
116 printed phantom will therefore contain multiple shifted layers, ensuring that reslicing of the CT  
117 image data will not result in sampling or moiré patterns.

118 In our experiments, we found that altering the line width by varying the extrusion rate alone does  
119 not provide sufficient spatial resolution due to the inherently slow response time of the extrusion  
120 process. Instead, we maintain a constant filament flow rate while changing the speed of the  
121 printhead to control the extrusion width.

## 122 **Phantom Design**

123 Calibration Phantom. The partial volume effect created by varying the filament line width with fixed  
124 line spacing determines the (local) mean material density and thus the x-ray attenuation in a CT  
125 scan. A calibration phantom was designed to determine the mapping between filament line widths  
126 and Hounsfield Units (HU) within the range of human lungs. A multi-sector phantom (cylinder  
127 divided into radial slices) with a diameter of 100 mm and a height of 10 mm was printed using  
128 PixelPrint. The phantom comprises ten sections with different material densities, from 10% to 100%  
129 at 10% intervals (Figure 1). CT measurements of this phantom were used to determine the 3D

130 printed maximum and minimum HU of PixelPrint, as well as the conversion between HU and  
131 filament line widths for patient-based phantoms.

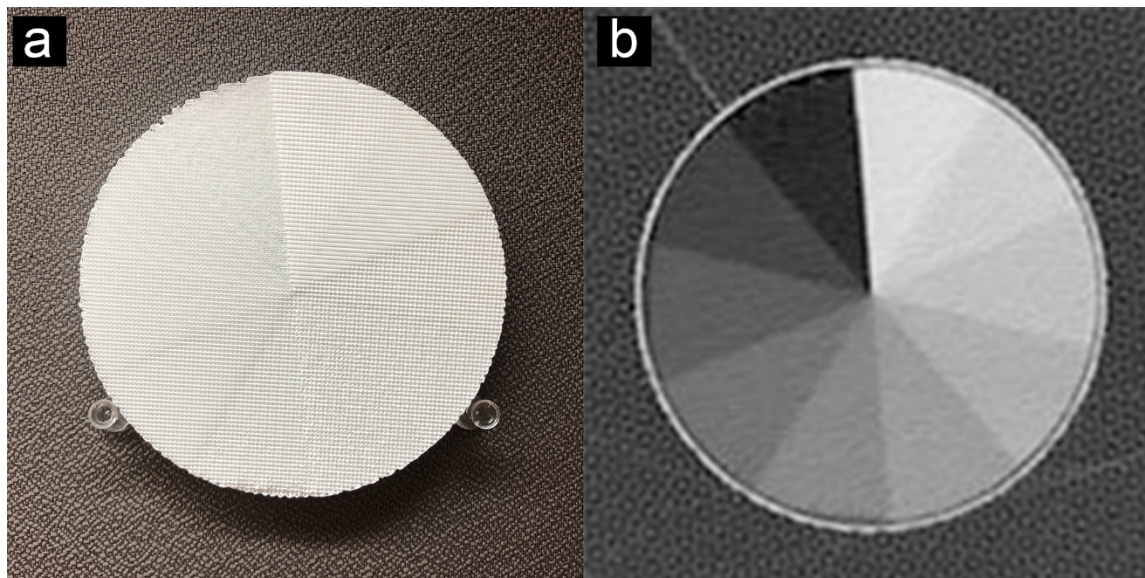

132  
133 **Figure 1.** Calibration phantom. (a) Photo of the multi-sector calibration phantom. (b) CT image of  
134 the phantom. Window level is -400 HU. Window width is 1500 HU.

135  
136 Patient-based Phantom. The Institutional Review Board (IRB) approved this retrospective study.  
137 A single data set of a patient who had been diagnosed with COVID-19 pneumonia and acute  
138 respiratory distress syndrome (ARDS) was selected from the PACS system at the Hospital of the  
139 University of Pennsylvania and anonymized. The CT images demonstrate extensive fibro-  
140 proliferative changes with both interstitial and alveolar components throughout the lung  
141 parenchyma. Imaging was performed in the supine position on a dual-source CT scanner  
142 (Somatom Drive, Siemens Healthineers, Erlangen, Germany). Table 1 presents acquisition and  
143 reconstruction parameters utilized for imaging. Since this proof-of-principle study focuses on lung  
144 imaging, the right lung of the patient was selected as input to reduce printing time and complexity.  
145 A 20 mm diameter ring surrounding the lung was added for better positioning of the phantom  
146 within the bore of a 300 x 400 mm<sup>2</sup> oval phantom representing a medium-sized patient (see details  
147 below). HU values were converted into filament line widths using the mapping calculated from the  
148 calibration phantom described above. A lower cut-off value of 10% and an upper cap of 100%  
149 material density were applied. The phantom is shown in Figure 3.

150

**Table 1.** Scan protocol for the patient-based phantom

|                                         |                                                                                  |
|-----------------------------------------|----------------------------------------------------------------------------------|
| Scanner model                           | Siemens SOMATON Drive                                                            |
| Tube voltage                            | 100 kVp (single source mode)                                                     |
| Tube current (at slice position)        | 292 mA                                                                           |
| Rotation time                           | 0.5 seconds                                                                      |
| Spiral pitch factor                     | 1.2                                                                              |
| Exposure (at slice position)            | 121 mAs                                                                          |
| CTDI <sub>vol</sub> (at slice position) | 4.54 mGy                                                                         |
| Slice thickness                         | 1 mm                                                                             |
| Reconstruction filter                   | Br49f(3) (diagnostic lung sharpest with iterative reconstruction ADMIRE level 3) |
| Reconstructed field of view             | 404 x 404 mm <sup>2</sup>                                                        |
| Matrix size                             | 512 x 512 pixel <sup>2</sup>                                                     |
| Pixel spacing (in x and y)              | 0.79 mm                                                                          |

151

## 152 **Phantom Production**

153 Phantoms were printed on a fused-filament 3D printer (Lulzbot TAZ 6 with M175 tool head, Fargo  
154 Additive Manufacturing Equipment 3D, LLC Fargo, ND, USA) using a 0.25 mm brass nozzle.  
155 Polylactic Acid (PLA) filament with a diameter of 1.75 mm (MakeShaper, Keene Village Plastics,  
156 Cleveland, OH, USA) was extruded at a nozzle temperature of 210 °C. To improve adhesion, the  
157 build plate was heated to 50 °C. Printing speed varied from 3.0 to 30 mm/s, producing line widths  
158 from 1.0 to 0.1 mm.

## 159 **Data Acquisition & Analysis**

160 For imaging, printed phantoms were placed inside the 20 cm bore of a technical phantom  
161 (Gammex multi-energy CT phantom, Sun Nuclear Corporation, Melbourne, FL, USA) to mimic  
162 attenuation profiles of an average-sized patient (300 x 400 mm<sup>2</sup>). Imaging was performed with  
163 the same CT scanner using the same protocol as the clinical acquisition (Table 1).

164 The scan of the multi-sector calibration phantom was performed with a higher tube current (800  
165 mA) to reduce the effects of Poisson noise. Square regions-of-interest (ROI) with a fixed size of  
166 14 x 14 pixels were manually positioned on the CT image to calculate HU statistics within the ten  
167 sectors of 10% to 100% material densities. Mean HU values and standard deviations were  
168 measured and Pearson's correlation coefficient was calculated using linear regression.

169 The scan of the patient-based phantom was performed with the same radiation dose level used  
170 for the patient scan (CTDI<sub>vol</sub> of 4.54 mGy at slice position). The resulting image was exported and  
171 registered to the original patient image using an affine transform available with the OpenCV  
172 library<sup>19</sup>. ROIs of different sizes in varied locations were manually placed in the vessel and  
173 parenchymal areas by an experienced thoracic radiologist (L.R., four years of experience) using  
174 ImageJ (National Institutes of Health, USA). See Figure 4 for exact ROI positions. Mean HU  
175 values and standard deviations were compared between the patient DICOM image and the  
176 phantom DICOM image. In addition, manual size measurements of three small oval structures  
177 were performed by the radiologist on both patient and phantom images using RadiAnt DICOM  
178 viewer (Medixant, Poznań, Poland).

## 179 **Results**

180 Printing of the multi-sector calibration phantom required 16 hours of printing time. The CT image  
181 of the phantom shows homogeneous appearances within the ten different material density regions.  
182 Figure 1 illustrates that individual printed filament lines are not visible. Measured mean HU values  
183 show a very high level of linear correlation with respect to the utilized filament line widths, with a  
184 Pearson's correlation coefficient  $r > 0.999$  (see Figure 2). The maximum HU (corresponding to  
185 100% material density) was measured as 115 and the minimum HU (corresponding to 10%  
186 material density) was measured as -867.



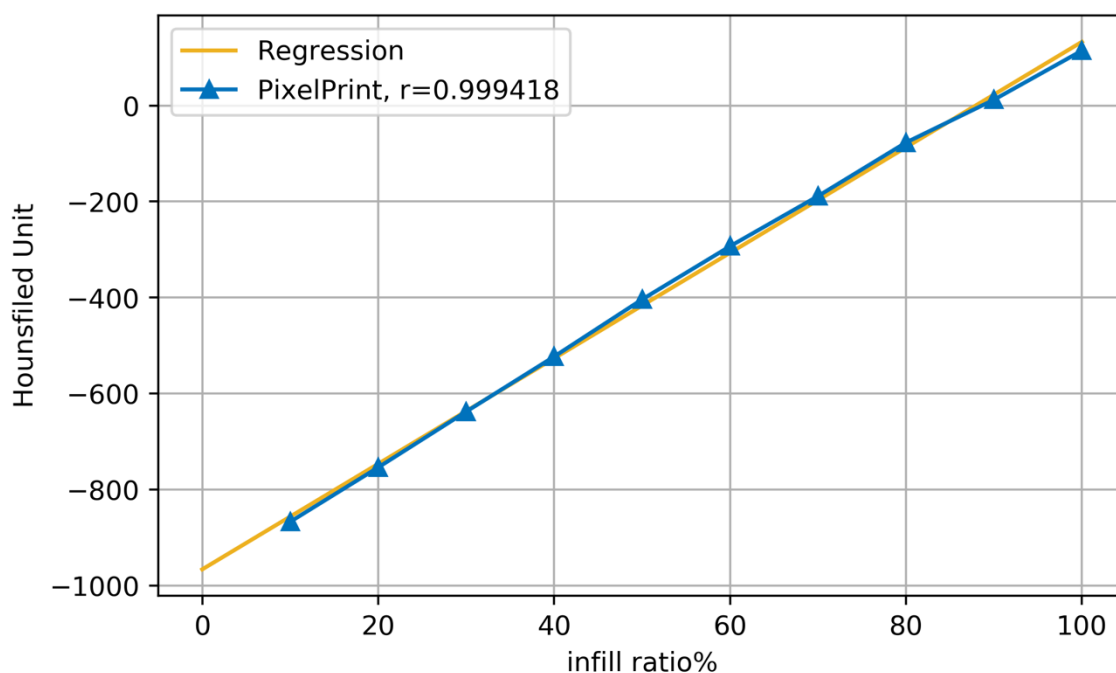

187  
188 **Figure 2.** Linear regression between material density and Hounsfield Units. Blue triangles show  
189 the mean values for regions of material density 10% to 100% in the multi-sector calibration  
190 phantom. The yellow line represents the regression line.  $r$  is Pearson's correlation coefficient.

191  
192 The results from the patient-based phantom are summarized in Figure 3. Panels a, b, and c show  
193 a photograph of the phantom, CT slice of the phantom, and original patient data, respectively.  
194 Printing of the patient-based phantom required 24 hours of printing time. The CT image of the  
195 phantom, shown in zoomed-in regions in the lower panels in Figure 3, closely resembles the  
196 original CT image in both texture and contrast levels, with clearly visible vascular and bronchial  
197 structures. Figure 4 shows the identical regions in patient and phantom data selected for density  
198 measurements. Although the patient image appears noisier than the phantom image, due to  
199 higher attenuation from the patient body, five ROIs show very similar mean values, with  
200 differences less than 15 HU (see Table 2). In general, lower density areas have a slightly higher  
201 difference due to the 10% material density cut-off used with PixelPrint.

202 Figure 5 presents the three manually measured anatomical features. Manual size measurements  
203 performed by the radiologist illustrate a high degree of geometrical correlation of details between  
204 the patient image and the phantom images, with differences smaller than the intrinsic spatial  
205 resolution of the scans (see Table 3).

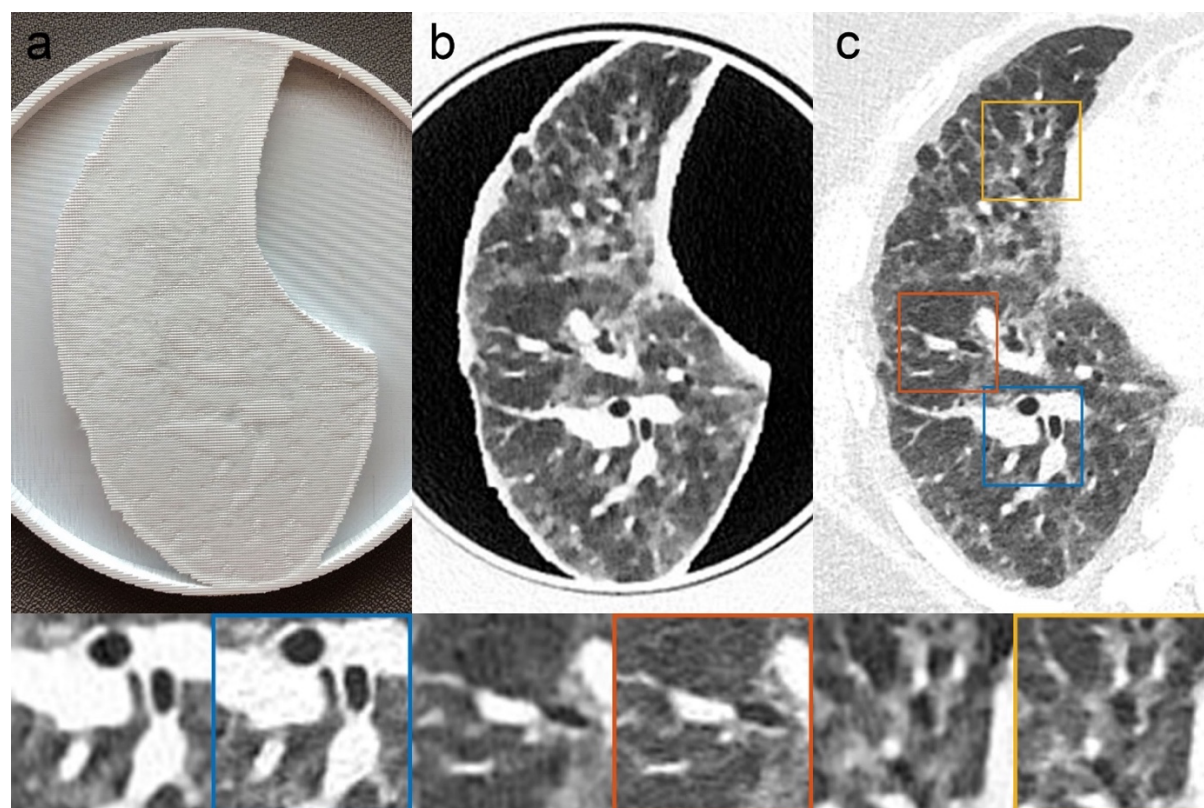

206  
207 **Figure 3.** Patient-based Lung Phantom visually highly resembles the original CT image both in  
208 texture and contrast levels. (a) Photography of the printed patient-based phantom. (b) CT image  
209 of patient-based phantom. (c) CT image of patient lung. Yellow, red and blue boxes indicate  
210 zoomed-in regions of the patient DICOM image. Window level is -500 HU. Window width is 1000  
211 HU.  
212

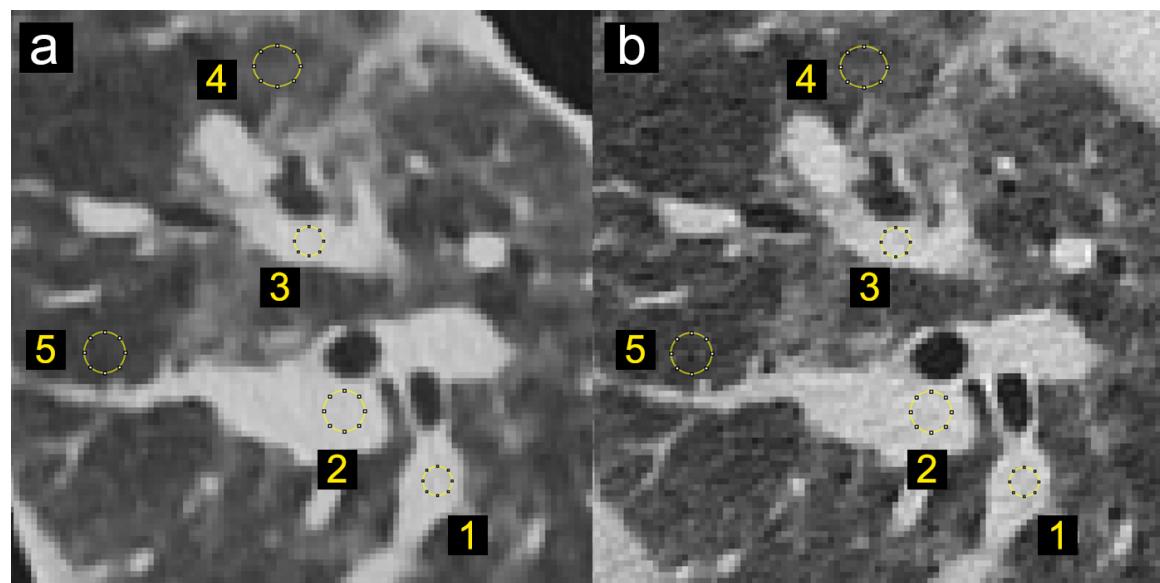

213  
214 **Figure 4.** Locations and size of the selected regions of interest for density measurements in  
215 patient and phantom data. (a) CT image of patient-based phantom. (b) CT image of original  
216 patient lung. Window level is -500 HU. Window width is 1000 HU.

217

218 **Table 2.** Mean and standard deviation of density measurements in patient and phantom data.

| Region | Area size [mm <sup>2</sup> ] | Patient   |             | Phantom   |             | Difference [HU] |
|--------|------------------------------|-----------|-------------|-----------|-------------|-----------------|
|        |                              | Mean [HU] | StdDev [HU] | Mean [HU] | StdDev [HU] |                 |
| 1      | 13.1                         | -16.6     | 51.2        | -20.8     | ± 27.3      | 4.2             |
| 2      | 23.0                         | 5.2       | 46.4        | -3.9      | ± 18.6      | 9.0             |
| 3      | 13.1                         | 16.1      | 49.3        | 11.3      | ± 35.4      | 4.8             |
| 4      | 27.4                         | -662.6    | 70.8        | -647.5    | ± 43.0      | -15.1           |
| 5      | 23.0                         | -781.2    | 65.5        | -771.1    | ± 33.7      | -10.1           |

219

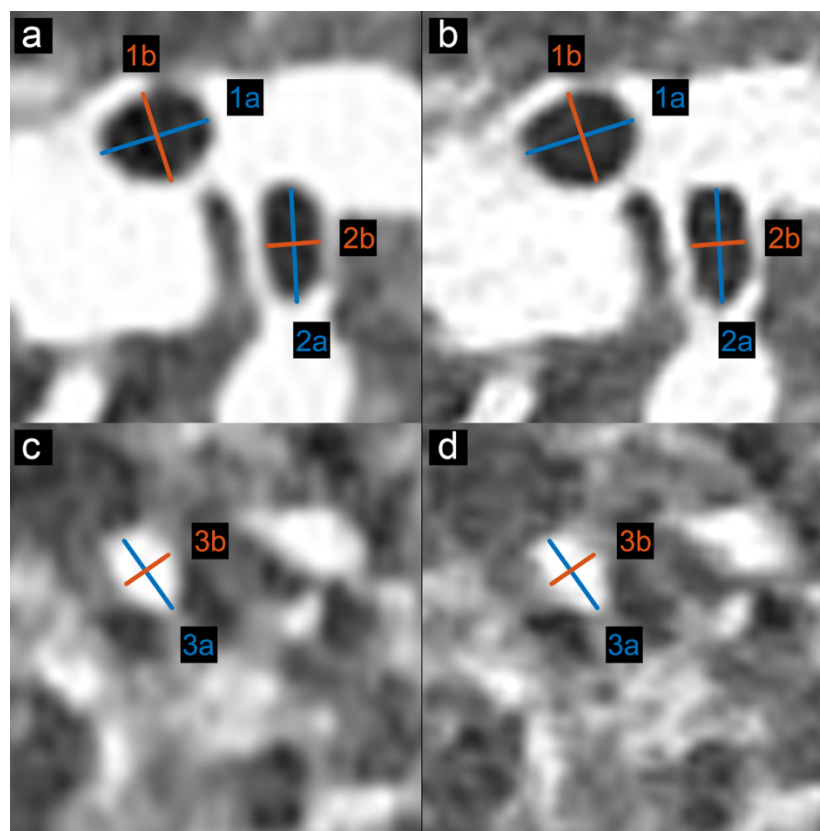

220

221 **Figure 5.** Locations and size of the selected anatomical features for size measurements in patient  
 222 and phantom data. (a) and (c) CT image of patient-based phantom. (b) and (d) CT image of  
 223 original patient lung. Window level is -500 HU. Window width is 1000 HU.

224

225 **Table 3.** Size measurement of anatomical features in patient and phantom data.

| Region | Patient            |                    | Phantom            |                    |
|--------|--------------------|--------------------|--------------------|--------------------|
|        | Major axis [mm], a | Minor axis [mm], b | Major axis [mm], a | Minor axis [mm], b |
| 1      | 7.00               | 5.47               | 7.27               | 5.49               |
| 2      | 7.64               | 3.43               | 7.45               | 3.31               |
| 3      | 5.59               | 4.12               | 5.70               | 4.21               |

## 226 Discussion

227 This paper introduces a novel 3D printing method, PixelPrint, that allows generation of patient-  
228 based phantoms with accurate organ geometry, image texture, and attenuation profiles. This  
229 method allows direct conversion of CT DICOM images into 3D printer instructions without  
230 segmentation. By eliminating segmentation, PixelPrint produces smooth, lifelike transitions  
231 between regions of different density. PixelPrint produces no boundary effects. The algorithm is  
232 strictly analytical with no filtering and no tuning parameters. The one-step translation of image  
233 data reduces information loss (due to segmentation and triangulation steps in the 3D modeling)  
234 and maintains spatial resolution. Regarding resolution, our variable speed printing concept allows  
235 us to control density on a voxel-by-voxel basis. Thus, we are enabling a cost-effective  
236 manufacturing process that generates realistic models of human lungs without sacrificing spatial  
237 and contrast resolution.

238 Over the last decade, several approaches have been proposed to produce clinically applicable  
239 CT phantoms. Kairn *et al.* introduced a method to generate a patient-based lung phantom<sup>20</sup>. They  
240 segmented CT images of the lung into three different regions and produced a tissue equivalent  
241 lung phantom. However, their approach is not able to meet the resolution requirements to  
242 represent structures in the lung parenchyma. Giron *et al.* and Joemai *et al.* developed a printed  
243 lung for image quality assessment in CT; their prints contain vascular structures with limited  
244 realistic lung textures<sup>10,21</sup>. Okkalidis *et al.* proposed a pixel-by-pixel algorithm<sup>14,17</sup>, translating  
245 DICOM images to printer instructions and printed patient-specific skull and chest phantoms.  
246 Results showed a reliable match in HU; however, detailed structures and textures within the lung  
247 are not visible. Jahnke *et al.* also introduced an alternative approach<sup>22,23</sup> of stacking radiopaque  
248 2D prints to form patient-based 3D phantom.

249 Our method enables the creation of real ground truth from clinical CT data, opening opportunities  
250 in the clinical and research arena. For day-to-day operations, our phantom concepts allow  
251 optimizing CT protocols with a focus on specific clinical tasks. For example, the clinical

252 introduction of advanced non-linear reconstruction algorithms<sup>24</sup> can be challenging due to the  
253 limited clinical value of technical phantoms and ethical difficulties of scanning patients twice for  
254 this purpose. With our phantoms, an ample parameter space can be evaluated to determine the  
255 optimal solution with respect to radiation exposure and diagnostic image quality. A positive effect  
256 could be achieved for CT research and development by accelerating clinical evaluations with  
257 patient-based phantoms. Predominantly novel data-driven developments in artificial intelligence  
258 and radiomics can gain significantly from early access to realistic clinical data. One open  
259 challenge is the effect of differences in CT protocols and inter-vendor variabilities on radiomic  
260 features<sup>25–28</sup>. With a representative group of patient-based phantoms manufactured with  
261 PixelPrint, one would be able to evaluate this effect fully and determine a robust and rigorous  
262 operating space for radiomic feature extraction. Further, the same group of phantoms may assist  
263 as a tool to evaluate and validate harmonization strategies.

264 The present study has some limitations. Only one patient-based phantom was evaluated for this  
265 proof-of-concept study. Follow-up studies will provide additional data and measurement to  
266 describe specific lung diseases such as COVID-19 pneumonia. For our initial study, we have  
267 focused on generated realistic models of the human lung. Future studies will be essential to add  
268 the capability to print soft tissue and bone to cover a broader range of anatomical regions and  
269 tissue x-ray attenuation.

270 Finally, we would like to allow the larger medical, academic, and industrial CT community to have  
271 access to PixelPrint. We can make copies of our phantoms available as well as customized  
272 phantoms based on specific CT images, which could include various lung diseases. For additional  
273 information, please see the project homepage: [www.pennmedicine.org/CTResearch/PixelPrint](http://www.pennmedicine.org/CTResearch/PixelPrint).

## 274 **Conclusion**

275 In conclusion, the present study is the first to illustrate the possibility of creating 3D printed patient-  
276 based lung phantoms with accurate organ geometry, image texture, and attenuation profiles. This  
277 may lead to a paradigm change for the development of novel CT hardware and software by

278 enabling accelerated evaluation and validation with realistic patient-based data. Ultimately this  
279 will shape the clinical day-to-day routine and benefit patients with novel and standardized CT  
280 imaging.

## 281 **Acknowledgement**

282 We acknowledge support through the National Institutes of Health (R01CA249538).

283

284

## 285 Reference

- 286 1. Mitsouras D, Liacouras PC, Wake N, Rybicki FJ. *RadioGraphics* Update: Medical 3D  
287 Printing for the Radiologist. *RadioGraphics*. 2020;40(4):E21-E23.  
288 doi:10.1148/rg.2020190217
- 289 2. Filippou V, Tsoumpas C. Recent advances on the development of phantoms using 3D  
290 printing for imaging with CT, MRI, PET, SPECT, and ultrasound. *Med Phys*.  
291 2018;45(9):e740-e760. doi:10.1002/mp.13058
- 292 3. Rengier F, Mehndiratta A, Von Tengg-Kobligh H, et al. 3D printing based on imaging  
293 data: Review of medical applications. *Int J Comput Assist Radiol Surg*. 2010;5(4):335-  
294 341. doi:10.1007/s11548-010-0476-x
- 295 4. Shahrubudin N, Lee TC, Ramlan R. An overview on 3D printing technology:  
296 Technological, materials, and applications. *Procedia Manuf*. 2019;35:1286-1296.  
297 doi:10.1016/j.promfg.2019.06.089
- 298 5. Tino R, Yeo A, Leary M, Brandt M, Kron T. A systematic review on 3D-Printed imaging  
299 and dosimetry phantoms in radiation therapy. *Technol Cancer Res Treat*. 2019;18:1-14.  
300 doi:10.1177/1533033819870208
- 301 6. Leng S, McGee K, Morris J, et al. Anatomic modeling using 3D printing: quality assurance  
302 and optimization. *3D Print Med*. 2017;3(1):1-14. doi:10.1186/s41205-017-0014-3
- 303 7. Dangelmaier J, Bar-Ness D, Daerr H, et al. Experimental feasibility of spectral photon-  
304 counting computed tomography with two contrast agents for the detection of endoleaks  
305 following endovascular aortic repair. *Eur Radiol*. 2018:1-8. doi:10.1007/s00330-017-5252-  
306 7
- 307 8. Kopp FK, Daerr H, Si-Mohamed S, et al. Evaluation of a preclinical photon-counting CT  
308 prototype for pulmonary imaging. *Sci Rep*. 2018;8(1):17386. doi:10.1038/s41598-018-  
309 35888-1
- 310 9. Muenzel D, Bar-Ness D, Roessl E, et al. Spectral Photon-counting cT: Initial Experience  
311 with Dual-Contrast Agent K-Edge Colonography. *Radiology*. 2017.  
312 doi:10.1148/radiol.2016160890
- 313 10. Hernandez-Giron I, den Harder JM, Streekstra GJ, Geleijns J, Veldkamp WJH.  
314 Development of a 3D printed anthropomorphic lung phantom for image quality  
315 assessment in CT. *Phys Medica*. 2019;57(November):47-57.  
316 doi:10.1016/j.ejmp.2018.11.015

- 317 11. Abdullah KA, McEntee MF, Reed W, Kench PL. Development of an organ-specific insert  
318 phantom generated using a 3D printer for investigations of cardiac computed tomography  
319 protocols. *J Med Radiat Sci.* 2018;65(3):175-183. doi:10.1002/jmrs.279
- 320 12. Li J, Gang G, Brehler M, Shi H, Stayman J. 3D-Printed Textured Phantoms for  
321 Assessment of High Resolution CT. In: *Medical Physics.* ; 2019:E209-E210.
- 322 13. Shi H, Gang G, Li J, Liapi E, Abbey C, Stayman JW. Performance assessment of texture  
323 reproduction in high-resolution CT. In: Samuelson FW, Taylor-Phillips S, eds. *Medical*  
324 *Imaging 2020: Image Perception, Observer Performance, and Technology Assessment.*  
325 Vol 11316. SPIE-Intl Soc Optical Eng; 2020:25. doi:10.1117/12.2550579
- 326 14. Solomon J, Ba A, Bochud F, Samei E. Comparison of low-contrast detectability between  
327 two CT reconstruction algorithms using voxel-based 3D printed textured phantoms. *Med*  
328 *Phys.* 2016;43(12):6497-6506. doi:10.1118/1.4967478
- 329 15. Ardila Pardo GL, Conzelmann J, Genske U, Hamm B, Scheel M, Jahnke P. 3D printing of  
330 anatomically realistic phantoms with detection tasks to assess the diagnostic  
331 performance of CT images. *Eur Radiol.* 2020;30(8):4557-4563. doi:10.1007/s00330-020-  
332 06808-7
- 333 16. Pegues H, Knudsen J, Tong H, et al. Using inkjet 3D printing to create contrast-enhanced  
334 textured physical phantoms for CT. In: Vol 10948. SPIE-Intl Soc Optical Eng; 2019:181.  
335 doi:10.1117/12.2512890
- 336 17. Okkalidis N. A novel 3D printing method for accurate anatomy replication in patient-  
337 specific phantoms. *Med Phys.* 2018;45(10):4600-4606. doi:10.1002/mp.13154
- 338 18. Okkalidis N, Marinakis G. Technical Note: Accurate replication of soft and bone tissues  
339 with 3D printing. *Med Phys.* 2020;47(5):2206-2211. doi:10.1002/mp.14100
- 340 19. Bradski G. The OpenCV Library. *Dr Dobb's J Softw Tools.* 2000.
- 341 20. Kairn T, Zahrani M, Cassim N, Livingstone AG, Charles PH, Crowe SB. Quasi-  
342 simultaneous 3D printing of muscle-, lung- and bone-equivalent media: a proof-of-  
343 concept study. *Phys Eng Sci Med.* 2020;43(2):701-710. doi:10.1007/s13246-020-00864-5
- 344 21. Joemai RMS, Geleijns J. Assessment of structural similarity in CT using filtered  
345 backprojection and iterative reconstruction: A phantom study with 3D printed lung  
346 vessels. *Br J Radiol.* 2017;90(1079). doi:10.1259/bjr.20160519
- 347 22. Jahnke P, Limberg FRP, Gerbl A, et al. Radiopaque three-dimensional printing: A method  
348 to create realistic CT phantoms. *Radiology.* 2017;282(2):569-575.



- 349           doi:10.1148/radiol.2016152710
- 350   23.    Jahnke P, Schwarz S, Ziegert M, Schwarz FB, Hamm B, Scheel M. Paper-based 3D  
351           printing of anthropomorphic CT phantoms: Feasibility of two construction techniques. *Eur*  
352           *Radiol.* 2019;29(3):1384-1390. doi:10.1007/s00330-018-5654-1
- 353   24.    Willemink MJ, Noël PB. The evolution of image reconstruction for CT—from filtered back  
354           projection to artificial intelligence. *Eur Radiol.* 2019;29(5):2185-2195.  
355           doi:10.1007/s00330-018-5810-7
- 356   25.    Ger RB, Zhou S, Chi PCM, et al. Comprehensive Investigation on Controlling for CT  
357           Imaging Variabilities in Radiomics Studies. *Sci Rep.* 2018;8(1):13047.  
358           doi:10.1038/s41598-018-31509-z
- 359   26.    Mackin D, Fave X, Zhang L, et al. Measuring computed tomography scanner variability of  
360           radiomics features. *Invest Radiol.* 2015;50(11):757-765.  
361           doi:10.1097/RLI.0000000000000180
- 362   27.    Larue RTHM, van Timmeren JE, de Jong EEC, et al. Influence of gray level discretization  
363           on radiomic feature stability for different CT scanners, tube currents and slice  
364           thicknesses: a comprehensive phantom study. *Acta Oncol (Madr).* 2017;56(11):1544-  
365           1553. doi:10.1080/0284186X.2017.1351624
- 366   28.    Ligero M, Jordi-Ollero O, Bernatowicz K, et al. Minimizing acquisition-related radiomics  
367           variability by image resampling and batch effect correction to allow for large-scale data  
368           analysis. *Eur Radiol.* 2021;31(3):1460-1470. doi:10.1007/s00330-020-07174-0
- 369
